# Supplementary material for: Sulfur Molecules in Space by X-rays: A Computational Study
Source: PubMed Central journal article supplement (PMC8028330; doi:10.1021/acsearthspacechem.0c00238), 2021-02-24
Supplement: sp0c00238_si_001.pdf [file sp0c00238_si_001.pdf]

# Supporting Information:

## Sulfur molecules in space by X-rays: a computational study

Goranka Bilalbegović,<sup>\*,†</sup> Aleksandar Maksimović,<sup>‡</sup> Lynne A. Valencic,<sup>¶,§</sup> and  
Susi Lehtola<sup>\*,||,⊥</sup>

<sup>†</sup>*Department of Physics, Faculty of Science, University of Zagreb, Bijenička cesta 32,  
10000 Zagreb, Croatia*

<sup>‡</sup>*Center of Excellence for Advanced Materials and Sensing Devices, Rudjer Bošković  
Institute, Bijenička cesta 54, 10000 Zagreb, Croatia*

<sup>¶</sup>*NASA Goddard Space Flight Center, Greenbelt, MD 20771, USA*

<sup>§</sup>*The Johns Hopkins University, Department of Physics & Astronomy, 366 Bloomberg  
Center, 3400 N. Charles St., Baltimore, MD 21218, USA*

<sup>||</sup>*Department of Chemistry, P.O. Box 55 (A. I. Virtasen aukio 1), FI-00014 University of  
Helsinki, Finland*

<sup>⊥</sup>*Present address: Molecular Sciences Software Institute, Blacksburg, Virginia 24061, USA*

E-mail: [goranka.bilalbegovic@gmail.com](mailto:goranka.bilalbegovic@gmail.com); [susi.lehtola@alumni.helsinki.fi](mailto:susi.lehtola@alumni.helsinki.fi)

Contents:

- Molecular structures for H<sub>2</sub>S, SO<sub>2</sub>, OCS, and CS: tables [S1](#), [S2](#), [S3](#) and [S4](#), respectively
- CVS-ADC(2)-x/un-aug-cc-pV(Q+d)Z spectra: figure [S1](#)
- CVS-ADC(2)-x/un-aug-pc-3 spectra with a smaller Gaussian broadening: figure [S2](#)
- CVS-ADC(2)-x/un-aug-pc-3 spectrum for H<sub>2</sub>S with a larger Gaussian broadening: figure [S3](#)
- CVS-ADC(2)-x/un-aug-pc-3 spectra with Lorentzian broadening: figure [S4](#)
- CVS-ADC(2)-x/un-aug-pc-3 stick spectra for H<sub>2</sub>S and CS: tables [S5](#) and [S6](#), respectively. Also includes data for the un-daug-pc-3 and un-taug-pc-3 basis sets
- CVS-ADC(2)-x/un-aug-pc-3 stick spectra for SO<sub>2</sub> and OCS: tables [S7](#) and [S8](#), respectively
- Basis set convergence of CVS coupled cluster calculations for H<sub>2</sub>S, SO<sub>2</sub>, OCS, and CS: tables [S9](#), [S10](#), [S11](#) and [S12](#), respectively
- CVS-CC2/un-aug-pc-3 stick spectra for H<sub>2</sub>S, SO<sub>2</sub>, OCS, and CS: tables [S13](#), [S14](#), [S15](#) and [S16](#), respectively. Also includes data for the un-daug-pc-3 basis set
- CVS-CCSD/un-aug-pc-3 stick spectra for H<sub>2</sub>S, SO<sub>2</sub>, OCS, and CS: tables [S17](#), [S18](#), [S19](#) and [S20](#), respectively.
- CVS-CC3/un-aug-pc-3 stick spectra for H<sub>2</sub>S, CS and OCS: tables [S21](#), [S22](#) and [S23](#), respectively.

Table S1: Molecular structure for H<sub>2</sub>S.

| atom | $x$ (Å)  | $y$ (Å)  | $z$ (Å)  |
|------|----------|----------|----------|
| S    | -0.00001 | -0.00001 | 0.10328  |
| H    | -0.00000 | 0.96537  | -0.82371 |
| H    | 0.00001  | -0.96537 | -0.82371 |

Table S2: Molecular structure for SO<sub>2</sub>.

| atom | $x$ (Å)  | $y$ (Å)  | $z$ (Å)  |
|------|----------|----------|----------|
| S    | 0.00000  | 0.00002  | 0.36551  |
| O    | 0.00000  | 1.23148  | -0.36386 |
| O    | -0.00000 | -1.23149 | -0.36387 |

Table S3: Molecular structure for OCS.

| atom | $x$ (Å) | $y$ (Å) | $z$ (Å)  |
|------|---------|---------|----------|
| S    | 0.00000 | 0.00000 | 1.03492  |
| C    | 0.00000 | 0.00000 | -0.52726 |
| O    | 0.00000 | 0.00000 | -1.67800 |

Table S4: Molecular structure for CS.

| atom | $x$ (Å) | $y$ (Å) | $z$ (Å)  |
|------|---------|---------|----------|
| S    | 0.00000 | 0.00000 | -0.41528 |
| C    | 0.00000 | 0.00000 | 1.10846  |

Table S5: CVS-ADC(2)-x stick spectrum for H<sub>2</sub>S, computed in the un-aug-pc-3 basis set and its doubly (daug) and triply (taug) augmented counterparts.

| un-aug-pc-3 |                | un-daug-pc-3 |                | un-taug-pc-3 |                |
|-------------|----------------|--------------|----------------|--------------|----------------|
| E (eV)      | I (arb. units) | E (eV)       | I (arb. units) | E (eV)       | I (arb. units) |
| 2474.006    | 0.0062         | 2474.006     | 0.0062         | 2474.006     | 0.0062         |
| 2474.764    | 0.0031         | 2474.764     | 0.0031         | 2474.764     | 0.0031         |
| 2477.529    | 0.0011         | 2477.501     | 0.0010         | 2477.501     | 0.0010         |
| 2477.586    | 0.0005         | 2477.580     | 0.0005         | 2477.580     | 0.0005         |
| 2477.619    | 0.0007         | 2477.585     | 0.0006         | 2477.585     | 0.0006         |
| 2477.746    | 0.0017         | 2477.710     | 0.0016         | 2477.710     | 0.0016         |
| 2478.28     | 0.0000         | 2478.196     | 0.0000         | 2478.196     | 0.0000         |
| 2478.595    | 0.0000         | 2478.372     | 0.0000         | 2478.372     | 0.0000         |
| 2478.738    | 0.0000         | 2478.495     | 0.0000         | 2478.494     | 0.0000         |
| 2479.032    | 0.0000         | 2478.645     | 0.0000         | 2478.643     | 0.0000         |

Table S6: CVS-ADC(2)-x stick spectrum for CS, computed in the un-aug-pc-3 basis set and its doubly (daug) and triply (taug) augmented counterparts.

| un-aug-pc-3 |                | un-daug-pc-3 |                | un-taug-pc-3 |                |
|-------------|----------------|--------------|----------------|--------------|----------------|
| E (eV)      | I (arb. units) | E (eV)       | I (arb. units) | E (eV)       | I (arb. units) |
| 2472.284    | 0.0048         | 2472.283     | 0.0048         | 2472.283     | 0.0048         |
| 2472.284    | 0.0048         | 2472.283     | 0.0048         | 2472.283     | 0.0048         |
| 2476.578    | 0.0017         | 2476.577     | 0.0017         | 2476.576     | 0.0017         |
| 2477.470    | 0.0001         | 2477.450     | 0.0001         | 2477.450     | 0.0001         |
| 2478.459    | 0.0010         | 2478.447     | 0.0009         | 2478.447     | 0.0009         |
| 2478.459    | 0.0010         | 2478.447     | 0.0009         | 2478.447     | 0.0009         |
| 2479.315    | 0.0002         | 2479.142     | 0.0000         | 2479.139     | 0.0000         |
| 2479.454    | 0.0000         | 2479.142     | 0.0000         | 2479.139     | 0.0000         |
| 2479.454    | 0.0000         | 2479.154     | 0.0003         | 2479.153     | 0.0003         |
| 2479.695    | 0.0006         | 2479.483     | 0.0002         | 2479.476     | 0.0001         |

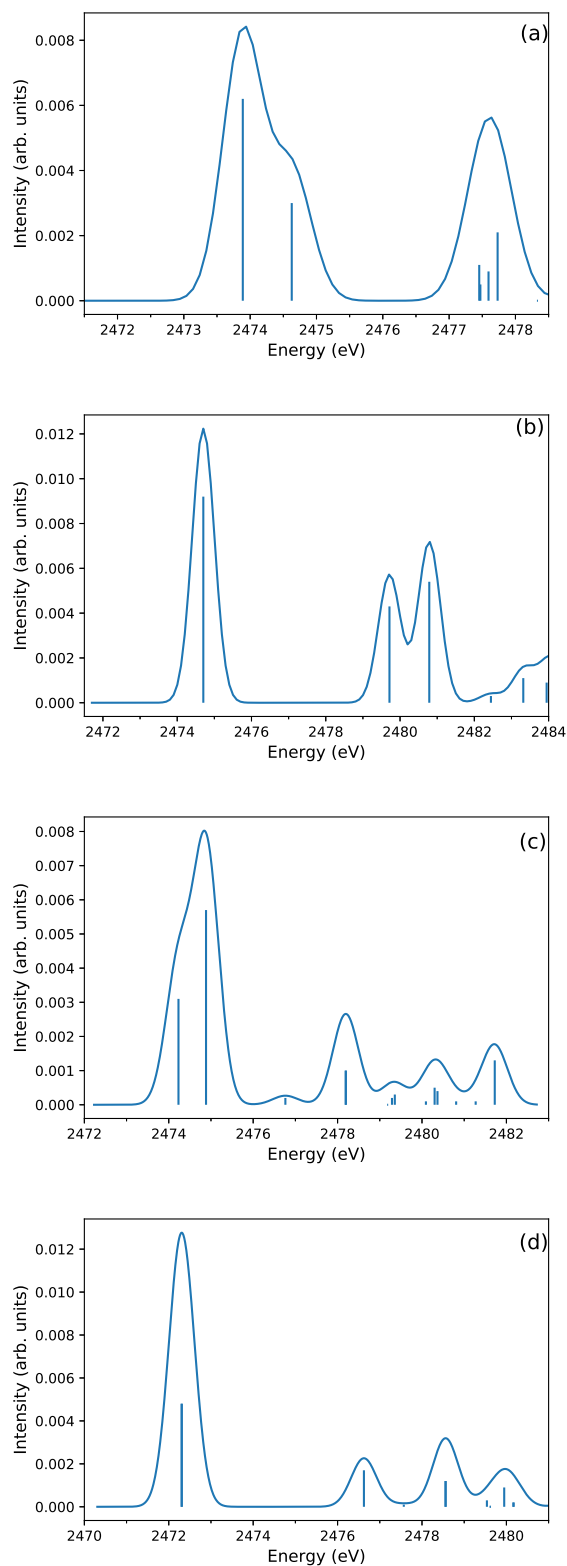

Figure S1: CVS-ADC(2)-x/un-aug-cc-pV(Q+d)Z spectra for (a) H<sub>2</sub>S, (b) SO<sub>2</sub>, (c) OCS, (d) CS. Vertical lines represent the calculated spectra, whereas the curves are the theoretical spectra broadened with Gaussian functions to simulate lifetime and detector resolution effects. The broadening parameter is 0.3 eV.

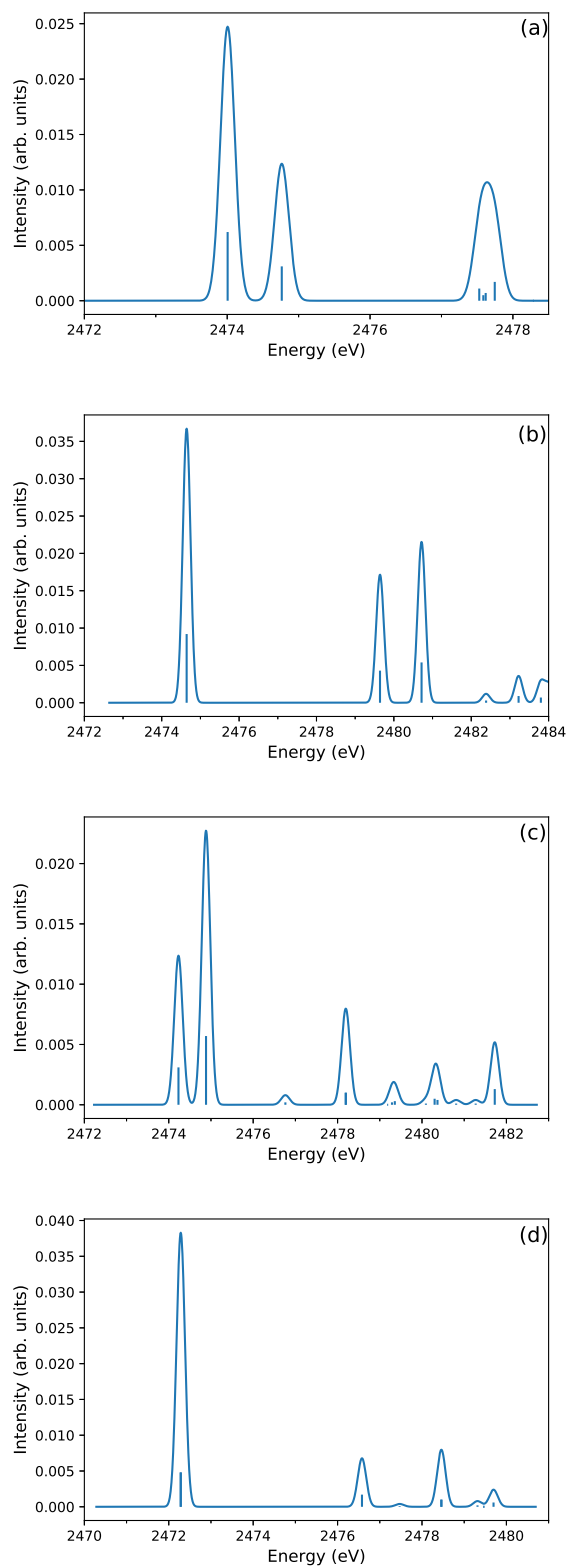

Figure S2: The CVS-ADC(2)-x/un-aug-pc-3 spectra with a small Gaussian broadening of 0.1 eV for (a)  $\text{H}_2\text{S}$ , (b)  $\text{SO}_2$ , (c)  $\text{OCS}$ , (d)  $\text{CS}$ . Vertical lines represent the calculated spectra, whereas the curves are the theoretical spectra broadened to simulate lifetime and detector resolution effects.

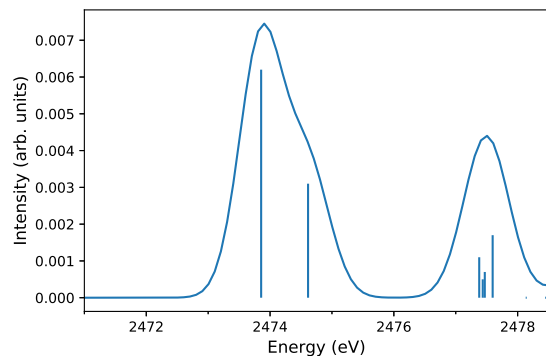

Figure S3: CVS-ADC(2)-x/un-aug-pc-3 spectrum of  $\text{H}_2\text{S}$  using the un-aug-pc-3 basis and a Gaussian broadening of 0.35 eV, showing that the shoulder of the first peak disappears. Vertical lines represent the calculated spectra, whereas the curves are the theoretical spectrum broadened to simulate lifetime and detector resolution effects.

Table S7: CVS-ADC(2)-x/un-aug-pc-3 stick spectrum for  $\text{SO}_2$ .

| E (eV)   | I (arb. units) |
|----------|----------------|
| 2474.644 | 0.0092         |
| 2479.642 | 0.0043         |
| 2480.716 | 0.0054         |
| 2482.384 | 0.0003         |
| 2483.224 | 0.0009         |
| 2483.800 | 0.0007         |
| 2484.011 | 0.0006         |
| 2484.586 | 0.0002         |
| 2484.691 | 0.0002         |
| 2484.897 | 0.0002         |
| 2484.902 | 0.0000         |
| 2485.030 | 0.0000         |
| 2485.475 | 0.0006         |
| 2485.762 | 0.0019         |
| 2486.085 | 0.0001         |
| 2486.527 | 0.0004         |
| 2486.581 | 0.0001         |
| 2486.643 | 0.0009         |
| 2486.907 | 0.0000         |
| 2487.085 | 0.0001         |

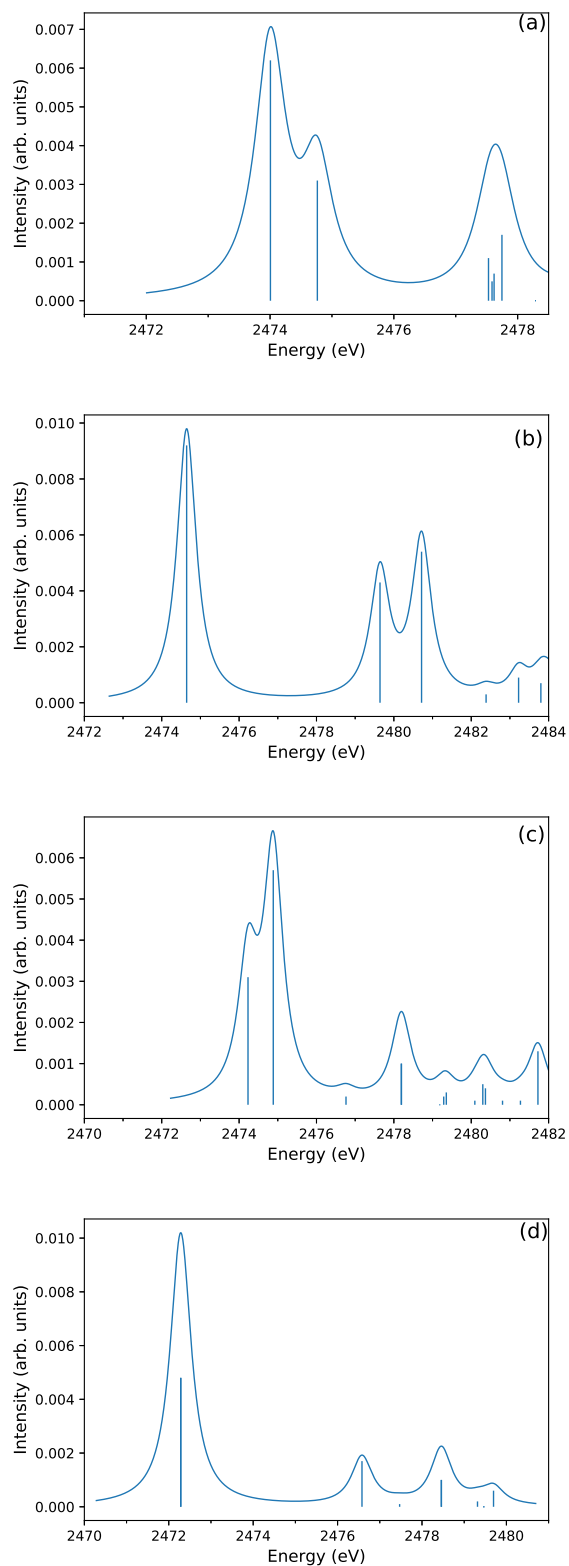

Figure S4: CVS-ADC(2)-x/un-aug-pc-3 spectrum for (a)  $\text{H}_2\text{S}$ , (b)  $\text{SO}_2$ , (c)  $\text{OCS}$ , (d)  $\text{CS}$ . Vertical lines represent the calculated spectra, whereas the curves are the theoretical stick spectra  $(\omega_i, I_i)$  broadened with the Lorentzian function  $I(\omega) = \sum_i \gamma I_i / [\pi[(\omega - \omega_i)^2 + \gamma^2]]$  to simulate lifetime and detector resolution effects. The broadening is  $\gamma = 0.3$  eV.



Table S8: CVS-ADC(2)-x/un-aug-pc-3 stick spectrum for OCS.

| E (eV)   | I (arb. units) |
|----------|----------------|
| 2474.230 | 0.0031         |
| 2474.230 | 0.0031         |
| 2474.883 | 0.0057         |
| 2476.763 | 0.0002         |
| 2478.193 | 0.0010         |
| 2478.196 | 0.0010         |
| 2478.196 | 0.0010         |
| 2479.175 | 0.0000         |
| 2479.175 | 0.0000         |
| 2479.289 | 0.0002         |
| 2479.356 | 0.0003         |
| 2479.356 | 0.0003         |
| 2480.093 | 0.0001         |
| 2480.299 | 0.0005         |
| 2480.367 | 0.0004         |
| 2480.367 | 0.0004         |
| 2480.809 | 0.0001         |
| 2481.272 | 0.0001         |
| 2481.272 | 0.0001         |
| 2481.724 | 0.0013         |

Table S9: Basis set convergence of coupled cluster results for the sulfur K edge of H<sub>2</sub>S.

| basis       | CVS-CC2 (eV) | CVS-CCSD (eV) | CVS-CC3 (eV) |
|-------------|--------------|---------------|--------------|
| un-aug-pc-0 | 2477.0       | 2478.6        | 2475.8       |
| un-aug-pc-1 | 2476.0       | 2477.4        | 2474.8       |
| un-aug-pc-2 | 2475.5       | 2476.9        | 2474.4       |
| un-aug-pc-3 | 2475.2       | 2476.7        | 2474.4       |

Table S10: Basis set convergence of coupled cluster results for the sulfur K edge of SO<sub>2</sub>.

| basis       | CVS-CC2 (eV) | CVS-CCSD (eV) |
|-------------|--------------|---------------|
| un-aug-pc-0 | 2478.4       | 2479.4        |
| un-aug-pc-1 | 2477.0       | 2478.2        |
| un-aug-pc-2 | 2476.1       | 2477.4        |
| un-aug-pc-3 | 2475.8       | 2477.1        |

Table S11: Basis set convergence of coupled cluster results for the sulfur K edge of OCS.

| basis       | CVS-CC2 (eV) | CVS-CCSD (eV) |
|-------------|--------------|---------------|
| un-aug-pc-0 | 2477.5       | 2479.4        |
| un-aug-pc-1 | 2476.2       | 2478.1        |
| un-aug-pc-2 | 2475.7       | 2477.6        |
| un-aug-pc-3 | 2475.5       | 2477.4        |

Table S12: Basis set convergence of coupled cluster results for the sulfur K edge of CS.

| basis       | CVS-CC2 (eV) | CVS-CCSD (eV) | CVS-CC3 (eV) |
|-------------|--------------|---------------|--------------|
| un-aug-pc-0 | 2475.7       | 2477.5        | 2474.0       |
| un-aug-pc-1 | 2474.4       | 2476.2        | 2472.7       |
| un-aug-pc-2 | 2474.0       | 2475.8        | 2472.3       |
| un-aug-pc-3 | 2473.8       | 2475.6        | 2472.0       |

Table S13: CVS-CC2 stick spectrum for H<sub>2</sub>S, computed in the un-aug-pc-3 basis set and its doubly (daug) augmented counterpart. Relativistic shift is not included.

| un-aug-pc-3 |                | un-daug-pc-3 |                |
|-------------|----------------|--------------|----------------|
| E (eV)      | I (arb. units) | E (eV)       | I (arb. units) |
| 2467.315    | 0.0055         | 2467.315     | 0.0055         |
| 2467.866    | 0.0023         | 2467.866     | 0.0023         |
| 2470.039    | 0.0003         | 2470.019     | 0.0003         |
| 2470.134    | 0.0012         | 2470.068     | 0.0010         |
| 2470.220    | 0.0004         | 2470.154     | 0.0003         |
| 2470.260    | 0.0012         | 2470.180     | 0.0010         |

Table S14: CVS-CC2 stick spectrum for SO<sub>2</sub>, computed in the un-aug-pc-3 basis set and its doubly (daug) augmented counterpart. Relativistic shift is not included.

| un-aug-pc-3 |                | un-daug-pc-3 |                |
|-------------|----------------|--------------|----------------|
| E (eV)      | I (arb. units) | E (eV)       | I (arb. units) |
| 2467.893    | 0.0082         | 2467.892     | 0.0082         |
| 2472.634    | 0.0038         | 2472.632     | 0.0038         |
| 2473.670    | 0.0043         | 2473.669     | 0.0043         |
| 2474.587    | 0.0002         | 2474.535     | 0.0001         |
| 2475.227    | 0.0007         | 2475.206     | 0.0007         |

Table S15: CVS-CC2 stick spectrum for OCS, computed in the un-aug-pc-3 basis set and its doubly (daug) augmented counterpart. Relativistic shift is not included.

| un-aug-pc-3 |                | un-daug-pc-3 |                |
|-------------|----------------|--------------|----------------|
| E (eV)      | I (arb. units) | E (eV)       | I (arb. units) |
| 2467.577    | 0.0029         | 2467.576     | 0.0029         |
| 2467.577    | 0.0029         | 2467.576     | 0.0029         |
| 2468.330    | 0.0043         | 2468.329     | 0.0043         |
| 2469.497    | 0.0005         | 2469.480     | 0.0005         |
| 2470.589    | 0.0009         | 2470.557     | 0.0008         |
| 2470.590    | 0.0007         | 2470.558     | 0.0006         |
| 2470.590    | 0.0007         | 2470.558     | 0.0006         |

Table S16: CVS-CC2 stick spectrum for CS, computed in the un-aug-pc-3 basis set and its doubly (daug) augmented counterpart. Relativistic shift is not included.

| un-aug-pc-3 |                | un-daug-pc-3 |                |
|-------------|----------------|--------------|----------------|
| E (eV)      | I (arb. units) | E (eV)       | I (arb. units) |
| 2465.857    | 0.0046         | 2465.857     | 0.0046         |
| 2465.857    | 0.0046         | 2465.857     | 0.0046         |
| 2469.824    | 0.0011         | 2469.813     | 0.0011         |
| 2470.294    | 0.0000         | 2470.266     | 0.0000         |
| 2471.087    | 0.0007         | 2471.050     | 0.0006         |
| 2471.087    | 0.0007         | 2471.050     | 0.0006         |

Table S17: CVS-CCSD/un-aug-pc-3 stick spectrum for H<sub>2</sub>S. Relativistic shift is not included.

| E (eV)   | I (arb. units) |
|----------|----------------|
| 2468.753 | 0.0063         |
| 2469.622 | 0.0032         |
| 2472.394 | 0.0015         |
| 2472.512 | 0.0006         |
| 2472.534 | 0.0003         |
| 2472.622 | 0.0019         |

Table S18: CVS-CCSD/un-aug-pc-3 stick spectrum for SO<sub>2</sub>. Relativistic shift is not included.

| E (eV)   | I (arb. units) |
|----------|----------------|
| 2469.195 | 0.0094         |
| 2474.195 | 0.0046         |
| 2475.214 | 0.0056         |
| 2476.944 | 0.0003         |
| 2477.789 | 0.0010         |

Table S19: CVS-CCSD/un-aug-pc-3 stick spectrum for OCS. Relativistic shift is not included.

| E (eV)   | I (arb. units) |
|----------|----------------|
| 2469.460 | 0.0034         |
| 2469.460 | 0.0034         |
| 2469.918 | 0.0056         |
| 2471.867 | 0.0002         |
| 2473.268 | 0.0012         |
| 2473.280 | 0.0011         |
| 2473.280 | 0.0011         |

Table S20: CVS-CCSD/un-aug-pc-3 stick spectrum for CS. Relativistic shift is not included.

| E (eV)   | I (arb. units) |
|----------|----------------|
| 2467.650 | 0.0051         |
| 2467.650 | 0.0051         |
| 2471.719 | 0.0017         |
| 2472.654 | 0.0001         |
| 2473.718 | 0.0011         |
| 2473.718 | 0.0011         |

Table S21: CVS-CC3/un-aug-pc-3 stick spectrum for H<sub>2</sub>S. Relativistic shift is not included.

| E (eV)   | I (arb. units) |
|----------|----------------|
| 2466.481 | 0.0021         |
| 2468.796 | 0.0003         |
| 2468.881 | 0.0001         |
| 2469.054 | 0.0011         |
| 2470.196 | 0.0005         |

Table S22: CVS-CC3/un-aug-pc-3 stick spectrum for CS. Relativistic shift is not included.

| E (eV)   | I (arb. units) |
|----------|----------------|
| 2464.148 | 0.0040         |
| 2464.148 | 0.0040         |
| 2468.777 | 0.0010         |
| 2469.320 | 0.0000         |
| 2470.038 | 0.0006         |
| 2470.038 | 0.0006         |

Table S23: CVS-CC3/un-aug-pc-3 stick spectrum for OCS. Relativistic shift is not included.

| E (eV)   | I (arb. units) |
|----------|----------------|
| 2467.075 | 0.0035         |
| 2468.293 | 0.0009         |
| 2469.363 | 0.0006         |
| 2469.363 | 0.0006         |
| 2469.392 | 0.0006         |
| 2470.390 | 0.0003         |
| 2470.390 | 0.0003         |
